# Supplementary material for: A Network Pharmacology Study on the Molecular Mechanisms of FDY003 for Breast Cancer Treatment
Source: Hindawi journal article supplement (doi:10.1155/2021/3919143), 2021-02-06
Supplement: f1 [file 3919143.f1.pdf]

*Supplementary Materials*

**A network pharmacology study on the molecular mechanisms of  
FDY003 for breast cancer**

Ho-Sung Lee<sup>1,2</sup>, In-Hee Lee<sup>1</sup>, Kyungrae Kang<sup>2</sup>, Sang-In Park<sup>3</sup>, Seung-Joon Moon<sup>2</sup>,  
Chol Hee Lee<sup>2</sup>, and Dae-Yeon Lee<sup>1,2,\*</sup>

<sup>1</sup>The Fore, 87 Ogeum-ro, Songpa-gu, Seoul 05542, Republic of Korea.

<sup>2</sup>Forest Hospital, 129 Ogeum-ro, Songpa-gu, Seoul 05549, Republic of Korea.

<sup>3</sup>Forestheal Hospital, 173 Ogeum-ro, Songpa-gu, Seoul 05641, Republic of Korea.

\*Correspondence should be addressed to Dae-Yeon Lee; foresthrnd@gmail.com

## Supplementary Figures

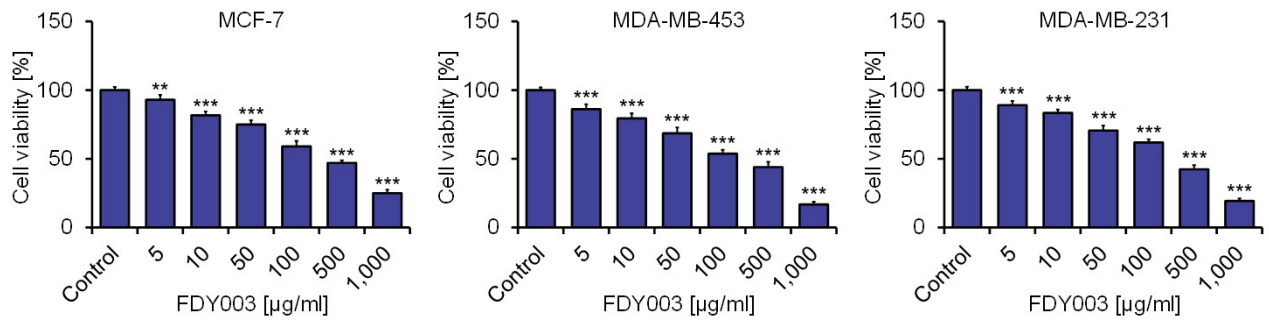

**Supplementary Figure S1. Effects of FDY003 on the viability of breast cancer cells.** MCF-7, MDA-MB-453, and MDA-MB-231 human breast cancer cells were treated with indicated doses of FDY003 for 72 hours and their viability was measured. Data represent the mean  $\pm$  S.D. of five replicates. p-values were calculated by comparison with untreated control cells. \*\*,  $p < 0.01$ ; \*\*\*,  $p < 0.001$ ; two-tailed Student's t-test.

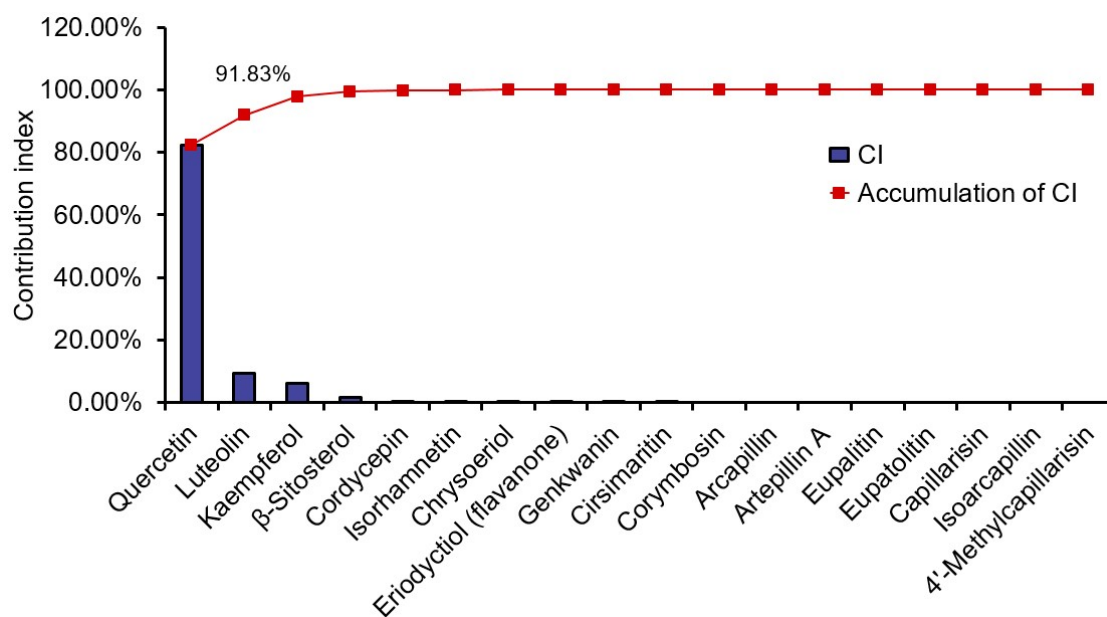

**Supplementary Figure S2. Contribution index analysis of active compounds of FDY003.** A graph depicting the analysis result of contribution index (CI) of active chemical compounds in FDY003. The sum of CIs for the top two compounds, quercetin and luteolin, was found to exceed 85%.

|                                               | Category           | Term                                                             | Count    | Percent [%] | p-value  |
|-----------------------------------------------|--------------------|------------------------------------------------------------------|----------|-------------|----------|
| Gene ontology                                 | Biological process | Cellular aromatic compound metabolic process                     | 82       | 1.38        | 7.89E-07 |
|                                               |                    | Cellular hormone metabolic process                               | 16       | 12.31       | 8.26E-12 |
|                                               |                    | Cellular response to chemical stimulus                           | 95       | 2.78        | 1.42E-33 |
|                                               |                    | Cellular response to chemical stress                             | 28       | 7.82        | 4.45E-17 |
|                                               |                    | Cellular response to drug                                        | 22       | 4.91        | 1.01E-08 |
|                                               |                    | Cellular response to growth factor stimulus                      | 22       | 3.08        | 6.48E-05 |
|                                               |                    | Cellular response to hormone stimulus                            | 31       | 4.28        | 9.71E-12 |
|                                               |                    | Cellular response to stimulus                                    | 115      | 1.48        | 2.16E-18 |
|                                               |                    | Cellular response to stress                                      | 53       | 2.52        | 1.85E-12 |
|                                               |                    | Cellular response to toxic substance                             | 15       | 5.93        | 2.42E-06 |
|                                               |                    | Cellular response to vascular endothelial growth factor stimulus | 7        | 10.00       | 2.33E-03 |
|                                               |                    | Drug metabolic process                                           | 29       | 4.83        | 3.78E-12 |
|                                               |                    | Estrogen metabolic process                                       | 11       | 34.38       | 9.27E-13 |
|                                               |                    | Hormone metabolic process                                        | 18       | 7.38        | 1.20E-09 |
|                                               |                    | Immune response                                                  | 41       | 1.79        | 3.04E-04 |
|                                               |                    | Positive regulation of blood vessel endothelial cell migration   | 7        | 8.86        | 5.31E-03 |
|                                               |                    | Regulation of apoptotic process                                  | 53       | 3.30        | 1.18E-17 |
|                                               |                    | Regulation of apoptotic signaling pathway                        | 19       | 4.59        | 1.02E-06 |
|                                               |                    | Regulation of cell cycle                                         | 27       | 2.13        | 2.71E-03 |
|                                               |                    | Regulation of cell death                                         | 56       | 3.19        | 3.03E-18 |
|                                               |                    | Regulation of cell migration                                     | 28       | 2.86        | 3.18E-06 |
|                                               |                    | Regulation of cell motility                                      | 30       | 2.88        | 6.45E-07 |
|                                               |                    | Regulation of cell population proliferation                      | 53       | 3.03        | 5.72E-16 |
|                                               |                    | Regulation of cellular metabolic process                         | 92       | 1.44        | 4.53E-10 |
|                                               |                    | Regulation of cellular response to stress                        | 28       | 3.66        | 1.08E-08 |
|                                               |                    | Regulation of defense response                                   | 21       | 2.60        | 2.18E-03 |
|                                               |                    | Regulation of DNA-binding transcription factor activity          | 16       | 3.64        | 6.41E-04 |
|                                               |                    | Regulation of growth                                             | 22       | 3.17        | 3.71E-05 |
|                                               |                    | Regulation of hormone levels                                     | 27       | 4.98        | 1.95E-11 |
|                                               |                    | Regulation of immune system process                              | 40       | 2.37        | 1.39E-07 |
|                                               |                    | Regulation of kinase activity                                    | 36       | 3.95        | 4.77E-13 |
|                                               |                    | Regulation of metabolic process                                  | 96       | 1.37        | 1.16E-09 |
|                                               |                    | Regulation of mitotic cell cycle phase transition                | 14       | 3.13        | 2.09E-02 |
|                                               |                    | Regulation of programmed cell death                              | 54       | 3.31        | 4.01E-18 |
|                                               |                    | Regulation of protein kinase activity                            | 30       | 3.74        | 9.70E-10 |
|                                               |                    | Regulation of response to stimulus                               | 80       | 1.81        | 2.54E-13 |
|                                               |                    | Regulation of response to stress                                 | 45       | 2.86        | 6.71E-12 |
|                                               |                    | Regulation of signal transduction                                | 61       | 1.88        | 3.40E-09 |
|                                               |                    | Regulation of signaling                                          | 72       | 1.96        | 5.44E-13 |
|                                               |                    | Regulation of stress-activated protein kinase signaling cascade  | 10       | 4.15        | 3.78E-02 |
|                                               |                    | Regulation of vascular endothelial growth factor production      | 5        | 15.63       | 8.92E-03 |
|                                               |                    | Response to chemical                                             | 106      | 2.16        | 6.20E-30 |
|                                               |                    | Response to drug                                                 | 49       | 4.48        | 1.17E-21 |
|                                               |                    | Response to estradiol                                            | 11       | 7.80        | 2.58E-05 |
|                                               |                    | Response to growth factor                                        | 22       | 2.96        | 1.27E-04 |
|                                               |                    | Response to hormone                                              | 40       | 3.91        | 1.00E-14 |
|                                               |                    | Response to radiation                                            | 21       | 4.70        | 7.37E-08 |
| Response to toxic substance                   | 28                 | 5.09                                                             | 3.35E-12 |             |          |
| Signal transduction in response to DNA damage | 8                  | 5.97                                                             | 1.97E-02 |             |          |

|               | Category            | Term                                                   | Count | Percent [%] | p-value  |
|---------------|---------------------|--------------------------------------------------------|-------|-------------|----------|
| Gene ontology | Cellular components | Cell                                                   | 24    | 2.15        | 7.02E-04 |
|               |                     | Chromosome                                             | 28    | 1.60        | 2.25E-02 |
|               |                     | Cyclin-dependent protein kinase holoenzyme complex     | 6     | 14.29       | 1.93E-04 |
|               |                     | Cytoplasm                                              | 113   | 0.97        | 2.77E-04 |
|               |                     | Cytosol                                                | 66    | 1.28        | 1.26E-04 |
|               |                     | Endomembrane system                                    | 63    | 1.39        | 1.35E-05 |
|               |                     | Endoplasmic reticulum                                  | 33    | 1.82        | 2.71E-04 |
|               |                     | Extracellular space                                    | 48    | 1.35        | 2.90E-03 |
|               |                     | Membrane                                               | 97    | 1.00        | 4.60E-03 |
|               |                     | Mitochondrion                                          | 26    | 1.59        | 4.70E-02 |
|               |                     | Nuclear chromosome                                     | 24    | 1.86        | 8.19E-03 |
|               |                     | Organelle                                              | 125   | 0.91        | 4.13E-04 |
|               |                     | Plasma membrane                                        | 63    | 1.12        | 2.72E-02 |
|               |                     | Protein kinase complex                                 | 8     | 7.84        | 2.81E-04 |
|               |                     | Vesicle                                                | 51    | 1.30        | 4.02E-03 |
|               | Molecular function  | Aromatase activity                                     | 7     | 25.93       | 7.64E-07 |
|               |                     | Catalytic activity                                     | 109   | 1.86        | 9.43E-26 |
|               |                     | Drug binding                                           | 52    | 2.95        | 1.36E-15 |
|               |                     | Enzyme binding                                         | 53    | 2.36        | 8.40E-12 |
|               |                     | Enzyme regulator activity                              | 21    | 2.01        | 3.72E-02 |
|               |                     | Estrogen 16-alpha-hydroxylase activity                 | 5     | 62.50       | 9.77E-07 |
|               |                     | Estrogen 2-hydroxylase activity                        | 3     | 60.00       | 3.10E-03 |
|               |                     | Kinase activity                                        | 37    | 4.49        | 7.76E-16 |
|               |                     | Ligand-activated transcription factor activity         | 6     | 12.77       | 1.10E-03 |
|               |                     | Nuclear receptor activity                              | 6     | 12.77       | 1.10E-03 |
|               |                     | Protein kinase activity                                | 36    | 5.87        | 3.72E-19 |
|               |                     | Signaling receptor binding                             | 32    | 1.95        | 4.92E-04 |
|               |                     | Steroid hormone receptor activity                      | 5     | 8.93        | 4.95E-02 |
|               |                     | Steroid hydroxylase activity                           | 10    | 26.32       | 1.49E-10 |
|               |                     | Transcription factor binding                           | 21    | 3.03        | 5.60E-05 |
| Pathway       | KEGG                | Apoptosis                                              | 11    | 8.09        | 9.38E-04 |
|               |                     | Breast cancer                                          | 11    | 7.48        | 1.96E-03 |
|               |                     | Cell cycle                                             | 10    | 8.06        | 2.45E-03 |
|               |                     | Cellular senescence                                    | 13    | 8.23        | 1.18E-04 |
|               |                     | EGFR tyrosine kinase inhibitor resistance              | 12    | 15.19       | 3.23E-07 |
|               |                     | Endocrine resistance                                   | 17    | 17.71       | 1.06E-11 |
|               |                     | ErbB signaling pathway                                 | 10    | 11.90       | 7.17E-05 |
|               |                     | Estrogen signaling pathway                             | 12    | 8.76        | 1.59E-04 |
|               |                     | Focal adhesion                                         | 14    | 7.07        | 2.80E-04 |
|               |                     | FoxO signaling pathway                                 | 13    | 10.16       | 1.02E-05 |
|               |                     | HIF-1 signaling pathway                                | 11    | 10.09       | 1.07E-04 |
|               |                     | MAPK signaling pathway                                 | 15    | 5.08        | 6.38E-03 |
|               |                     | p53 signaling pathway                                  | 9     | 12.50       | 1.71E-04 |
|               |                     | Pathways in cancer                                     | 36    | 6.81        | 3.21E-12 |
|               |                     | PD-L1 expression and PD-1 checkpoint pathway in cancer | 11    | 12.36       | 1.34E-05 |
|               |                     | PI3K-Akt signaling pathway                             | 24    | 6.82        | 1.18E-07 |
|               |                     | Platinum drug resistance                               | 7     | 9.72        | 1.26E-02 |
|               |                     | Ras signaling pathway                                  | 12    | 5.19        | 2.84E-02 |
|               |                     | Steroid hormone biosynthesis                           | 12    | 20.00       | 1.14E-08 |
|               |                     | TNF signaling pathway                                  | 13    | 11.61       | 2.03E-06 |
|               |                     | VEGF signaling pathway                                 | 9     | 15.25       | 3.01E-05 |
|               |                     | Wnt signaling pathway                                  | 10    | 6.25        | 2.10E-02 |

**Supplementary Figure S3. Functional enrichment analysis for the breast cancer-associated targets of FDY003.** Tables showing the result of gene ontology and pathway enrichment analysis for the breast cancer-related targets of FDY003.

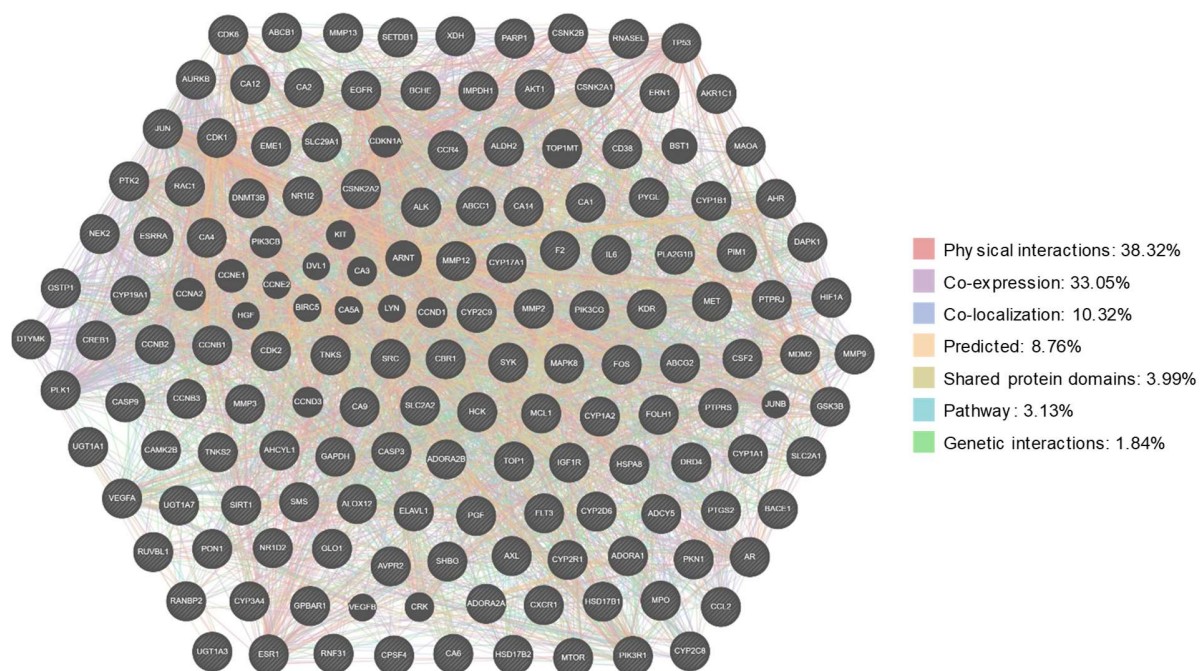

**Supplementary Figure S4. Functional interaction analysis for the breast cancer-associated targets of FDY003.** Black nodes, breast cancer-related targets; colored edges, distinct mechanisms underlying functional interactions between the targets.

## Supplementary Tables

**Supplementary Table S1. List of the chemical compounds in FDY003.**

| Herbal medicines | Compound                                                                                                                                                      | OB    | Caco-2 | DL   | Hdon | Hacc | MW     | AlogP | RBN |
|------------------|---------------------------------------------------------------------------------------------------------------------------------------------------------------|-------|--------|------|------|------|--------|-------|-----|
| LjT              | (-)-(3R,8S,9R,9aS,10aS)-9-ethenyl-8-(beta-D-glucopyranosyloxy)-2,3,9,9a,10,10a-hexahydro-5-oxo-5H,8H-pyrano[4,3-d]oxazolo[3,2-a]pyridine-3-carboxylic acid    | 3.22  | -1.72  | 0.80 | 5    | 12   | 443.45 | -2.71 | 5   |
| LjT              | (-)-(3R,8S,9R,9aS,10aS)-9-ethenyl-8-(beta-D-glucopyranosyloxy)-2,3,9,9a,10,10a-hexahydro-5-oxo-5H,8H-pyrano[4,3-d]oxazolo[3,2-a]pyridine-3-carboxylic acid_qt | 87.47 | -0.55  | 0.23 | 2    | 7    | 281.29 | -0.96 | 2   |
| LjT              | (-)-Caryophyllene oxide                                                                                                                                       | 32.67 | 1.58   | 0.13 | 0    | 1    | 220.39 | 3.52  | 0   |
| LjT              | ()-Menthol                                                                                                                                                    | 59.33 | 1.27   | 0.03 | 1    | 1    | 156.30 | 2.78  | 1   |
| LjT              | (-)- $\alpha$ -Pinene                                                                                                                                         | 46.25 | 1.85   | 0.05 | 0    | 0    | 136.26 | 2.87  | 0   |
| LjT              | ()- $\alpha$ -Terpineol                                                                                                                                       | 46.30 | 1.28   | 0.03 | 1    | 1    | 154.28 | 2.42  | 1   |
| LjT              | (+)-Ledol                                                                                                                                                     | 16.96 | 1.43   | 0.12 | 1    | 1    | 222.41 | 3.20  | 0   |
| LjT              | (1 $\alpha$ ,3R,4 $\alpha$ ,5R)-3,4,5-Tris[[[(2E)-3-(3,4-dihydroxyphenyl)-1-oxo-2-propen-1-yl]oxy]-1-hydroxycyclohexanecarboxylic acid                        | 3.01  | -1.46  | 0.45 | 7    | 15   | 677.63 | 2.86  | 13  |
| LjT              | (1R,2R,4R)-Dihydrocarveol                                                                                                                                     | 51.17 | 1.32   | 0.03 | 1    | 1    | 154.28 | 2.58  | 1   |

|     |                                                                                            |       |      |      |   |   |        |       |    |
|-----|--------------------------------------------------------------------------------------------|-------|------|------|---|---|--------|-------|----|
| LjT | (1R,4S,4aR)-1-isopropyl-4-methyl-7-methylene-2,3,4,4a,5,6-hexahydro-1H-naphthalene         | 19.50 | 1.84 | 0.08 | 0 | 0 | 204.39 | 4.80  | 1  |
| LjT | (1S,2S)-2-isopropenyl-4-isopropylidene-1-methyl-1-vinylcyclohexane                         | 34.47 | 1.87 | 0.06 | 0 | 0 | 204.39 | 4.93  | 2  |
| LjT | (1S,4E,8E,10R)-4,8,11,11-tetramethylbicyclo[8.1.0]undeca-4,8-diene                         | 21.69 | 1.86 | 0.08 | 0 | 0 | 204.39 | 4.70  | 0  |
| LjT | (2S)-2-methylbutan-1-ol                                                                    | 81.23 | 1.06 | 0.00 | 1 | 1 | 88.17  | 1.29  | 2  |
| LjT | (3R,4aS,5R,6R)-6-hydroxy-3-methoxy-5-vinyl-4,4a,5,6-tetrahydro-3H-pyrano[5,4-c]pyran-1-one | 60.89 | 0.09 | 0.10 | 1 | 5 | 226.25 | -0.04 | 2  |
| LjT | (5Z,9Z)-6,10,14-trimethylpentadeca-5,9,13-trien-2-one                                      | 37.84 | 1.58 | 0.10 | 0 | 1 | 262.48 | 5.45  | 9  |
| LjT | (E,E,E)-3,7-11,16-tetramethyl hexadeca-2,6,10,14-tetraen-1-ol                              | 42.48 | 1.42 | 0.14 | 1 | 1 | 290.54 | 6.60  | 11 |
| LjT | (E,Z)-farnesol                                                                             | 36.73 | 1.32 | 0.06 | 1 | 1 | 222.41 | 4.76  | 7  |
| LjT | (S)-phenethyl 2-bromopropanoate                                                            | 9.10  | 1.27 | 0.05 | 0 | 2 | 257.14 | 3.19  | 5  |
| LjT | (Z,E)-farnesol                                                                             | 41.14 | 1.34 | 0.06 | 1 | 1 | 222.41 | 4.76  | 6  |
| LjT | [(1S)-endo]-(-)-Borneol                                                                    | 83.54 | 1.22 | 0.05 | 1 | 1 | 154.28 | 1.98  | 0  |
| LjT | 1,6-Dicyclohexylhexane                                                                     | 15.40 | 1.81 | 0.11 | 0 | 0 | 250.52 | 7.43  | 7  |



|     |                                                                                                                                   |       |       |      |   |    |        |       |    |
|-----|-----------------------------------------------------------------------------------------------------------------------------------|-------|-------|------|---|----|--------|-------|----|
| LjT | 1H,3H-Pyrano(3,4-c)pyran-1-one, 5-ethenyl-6-(beta-D-glucopyranosyloxy)-4,4a,5,6-tetrahydro-, (4aS-(4aalpha,5beta,6alpha))-        | 4.96  | -1.08 | 0.38 | 4 | 9  | 358.38 | -1.59 | 4  |
| LjT | 2-(2,4-dimethoxyphenyl)-3-hydroxy-7-methoxychromone                                                                               | 12.94 | 0.72  | 0.33 | 1 | 6  | 328.34 | 2.52  | 4  |
| LjT | 2-(3,4-dimethoxyphenyl)-5-hydroxy-7-methoxychromone                                                                               | 29.24 | 0.90  | 0.34 | 1 | 6  | 328.34 | 2.82  | 3  |
| LjT | 2,3-DIMETHYLPYRAZINE                                                                                                              | 30.82 | 1.07  | 0.02 | 0 | 2  | 108.16 | 0.09  | 0  |
| LjT | 2-[(1R,3S,4S)-3-isopropenyl-4-methyl-4-vinylcyclohexyl]propan-2-ol                                                                | 19.03 | 1.37  | 0.07 | 1 | 1  | 222.41 | 3.70  | 3  |
| LjT | 2-[(2S,5R)-5-ethenyl-5-methyloxolan-2-yl]propan-2-ol                                                                              | 68.08 | 0.99  | 0.04 | 1 | 2  | 170.28 | 1.43  | 2  |
| LjT | 2-bromododecane                                                                                                                   | 17.60 | 1.82  | 0.03 | 0 | 0  | 249.27 | 5.89  | 9  |
| LjT | 2H-Pyran-5-carboxylic acid, 4-(2,2-dimethoxyethyl)-3-ethenyl-2-(beta-D-glucopyranosyloxy)-3,4-dihydro-, methyl ester, (2S,3R,4S)- | 22.59 | -1.25 | 0.45 | 4 | 11 | 434.49 | -1.73 | 10 |
| LjT | 2-isopropenyl-5-methylhex-4-enal                                                                                                  | 27.69 | 1.33  | 0.02 | 0 | 1  | 152.26 | 2.83  | 4  |
| LjT | 2-METHYLPENTADECANE                                                                                                               | 4.35  | 1.82  | 0.06 | 0 | 0  | 226.50 | 7.47  | 12 |
| LjT | 3,4-Dicaffeoylquinic acid                                                                                                         | 1.71  | -1.40 | 0.69 | 6 | 12 | 515.48 | 0.88  | 9  |

|     |                                                                |       |       |      |   |    |        |       |    |
|-----|----------------------------------------------------------------|-------|-------|------|---|----|--------|-------|----|
| LjT | 3,4-Dimethyl-2-hexanone                                        | 35.01 | 1.38  | 0.01 | 0 | 1  | 128.24 | 2.05  | 3  |
| LjT | 3,4-di-O-caffeoylquinic acid methyl ester                      | 1.71  | -1.02 | 0.69 | 6 | 12 | 530.52 | 1.81  | 10 |
| LjT | 3,5-di-O-caffeoylquinic acid methyl ester                      | 1.73  | -0.96 | 0.68 | 6 | 12 | 530.52 | 1.81  | 10 |
| LjT | 3-Hexenol                                                      | 62.74 | 1.05  | 0.01 | 1 | 1  | 100.18 | 1.44  | 3  |
| LjT | 3-Methyl-2-pent-2-enyl-cyclopent-2-enone                       | 25.28 | 1.52  | 0.03 | 0 | 1  | 164.27 | 2.97  | 3  |
| LjT | 3-O-Methylquercetin                                            | 10.10 | 0.20  | 0.30 | 4 | 7  | 316.28 | 1.57  | 2  |
| LjT | 4,5-Dicaffeoylquinic acid                                      | 1.73  | -1.37 | 0.69 | 6 | 12 | 515.48 | 0.88  | 9  |
| LjT | 4,5-di-O-caffeoylquinic acid methyl ester                      | 1.73  | -0.99 | 0.69 | 6 | 12 | 530.52 | 1.81  | 10 |
| LjT | 4,5'-Retro-.beta.,.beta.-Carotene-3,3'-dione, 4',5'-didehydro- | 31.22 | 1.17  | 0.55 | 0 | 2  | 562.90 | 9.27  | 9  |
| LjT | 4-caffeoylquinic acid                                          | 10.48 | -1.52 | 0.33 | 5 | 9  | 353.33 | -1.09 | 5  |
| LjT | 4-stearylmorpholine                                            | 14.80 | 1.48  | 0.27 | 0 | 2  | 339.68 | 7.72  | 17 |
| LjT | 5-O-Caffeoyl quinic acid butyl ester                           | 8.77  | -0.65 | 0.41 | 5 | 9  | 410.46 | 1.16  | 9  |
| LjT | 7-epi-Loganin                                                  | 4.78  | -1.65 | 0.44 | 5 | 10 | 390.43 | -2.08 | 5  |
| LjT | 7-epi-Loganin_qt                                               | 85.12 | -0.28 | 0.10 | 2 | 5  | 228.27 | -0.33 | 2  |

|     |                         |       |       |      |    |    |        |       |    |
|-----|-------------------------|-------|-------|------|----|----|--------|-------|----|
| LjT | 7-epi-Vogeloside        | 46.13 | -1.30 | 0.58 | 4  | 11 | 432.47 | -0.19 | 6  |
| LjT | 7-epi-Vogeloside_qt     | 33.26 | 0.04  | 0.16 | 1  | 6  | 270.31 | 0.99  | 3  |
| LjT | 8-epiloganin            | 11.68 | -1.74 | 0.44 | 5  | 10 | 390.43 | -2.08 | 5  |
| LjT | 8-epiloganin_qt         | 26.42 | -0.64 | 0.10 | 2  | 5  | 228.27 | -0.33 | 2  |
| LjT | 9-epi-(E)-caryophyllene | 30.28 | 1.83  | 0.09 | 0  | 0  | 204.39 | 4.75  | 0  |
| LjT | Akebiasaponin D         | 1.67  | -3.02 | 0.07 | 11 | 18 | 929.23 | 0.44  | 10 |
| LjT | Akebiasaponin D_qt      | 16.44 | 0.19  | 0.74 | 3  | 4  | 472.78 | 5.33  | 2  |
| LjT | Alloaromadrene          | 53.46 | 1.83  | 0.10 | 0  | 0  | 204.39 | 4.22  | 0  |
| LjT | Amylol                  | 76.16 | 1.02  | 0.00 | 1  | 1  | 88.17  | 1.43  | 3  |
| LjT | Apigenin                | 23.06 | 0.43  | 0.21 | 3  | 5  | 270.25 | 2.33  | 1  |
| LjT | Astragalin              | 14.03 | -1.34 | 0.74 | 7  | 11 | 448.41 | -0.32 | 4  |
| LjT | Atractylodin            | 44.49 | 2.00  | 0.05 | 0  | 1  | 182.23 | 3.83  | 1  |
| LjT | BNL                     | 41.30 | 1.79  | 0.04 | 0  | 0  | 166.34 | 4.69  | 1  |
| LjT | BZM                     | 18.64 | 1.36  | 0.09 | 0  | 2  | 212.26 | 3.27  | 4  |
| LjT | C09704                  | 29.56 | 1.37  | 0.06 | 1  | 1  | 222.41 | 4.56  | 7  |

|     |                  |       |       |      |   |    |        |       |    |
|-----|------------------|-------|-------|------|---|----|--------|-------|----|
| LjT | Caeruloside C    | 55.64 | -2.91 | 0.73 | 7 | 15 | 550.57 | -3.70 | 11 |
| LjT | Caeruloside C_qt | 5.40  | -1.64 | 0.37 | 4 | 10 | 388.41 | -1.95 | 8  |
| LjT | Caffeate         | 54.97 | 0.27  | 0.05 | 3 | 4  | 180.17 | 1.37  | 2  |
| LjT | CAM              | 67.17 | 1.29  | 0.05 | 0 | 1  | 152.26 | 1.94  | 0  |
| LjT | Caprylic acid    | 16.40 | 0.90  | 0.02 | 1 | 2  | 144.24 | 2.72  | 6  |
| LjT | Cedrol           | 16.23 | 1.35  | 0.12 | 1 | 1  | 222.41 | 3.16  | 0  |
| LjT | Centauroside     | 4.37  | -2.95 | 0.43 | 8 | 19 | 758.80 | -3.11 | 16 |
| LjT | Centauroside_qt  | 55.79 | -0.84 | 0.50 | 2 | 9  | 434.48 | 0.38  | 10 |
| LjT | Chlorogenic acid | 11.93 | -1.03 | 0.33 | 6 | 9  | 354.34 | -0.42 | 5  |
| LjT | Chrysoeriol      | 35.85 | 0.39  | 0.27 | 3 | 6  | 300.28 | 2.32  | 2  |
| LjT | CIS-2-PENTENOL   | 66.40 | 1.02  | 0.00 | 1 | 1  | 86.15  | 1.12  | 2  |
| LjT | Copaene          | 29.47 | 1.81  | 0.12 | 0 | 0  | 204.39 | 4.17  | 1  |
| LjT | Corymbosin       | 51.96 | 0.88  | 0.41 | 1 | 7  | 358.37 | 2.80  | 5  |
| LjT | Cosmetin         | 9.68  | -1.08 | 0.74 | 6 | 10 | 432.41 | 0.43  | 4  |
| LjT | D-Camphene       | 34.98 | 1.81  | 0.04 | 0 | 0  | 136.26 | 2.93  | 0  |

|     |                           |       |       |      |    |    |         |       |    |
|-----|---------------------------|-------|-------|------|----|----|---------|-------|----|
| LjT | Dehydroxymorroniside      | 20.69 | -1.25 | 0.46 | 4  | 10 | 388.41  | -2.25 | 5  |
| LjT | Dehydroxymorroniside_qt   | 29.40 | 0.12  | 0.10 | 1  | 5  | 226.25  | -0.51 | 2  |
| LjT | Desaspidinol-A            | 30.51 | 0.64  | 0.05 | 2  | 4  | 182.19  | 1.02  | 2  |
| LjT | Dinethylsecologanoside    | 48.46 | -1.37 | 0.48 | 4  | 12 | 434.44  | -0.79 | 10 |
| LjT | Dinethylsecologanoside_qt | 4.50  | -0.21 | 0.12 | 1  | 7  | 272.28  | 0.39  | 7  |
| LjT | Disacoside B              | 1.99  | -3.95 | 0.03 | 13 | 22 | 1075.39 | -0.41 | 12 |
| LjT | Disacoside B_qt           | 15.83 | 0.17  | 0.74 | 3  | 4  | 472.78  | 5.33  | 2  |
| LjT | Dodekan                   | 17.74 | 1.79  | 0.02 | 0  | 0  | 170.38  | 5.85  | 9  |
| LjT | Eriodictyol-7-o-glucoside | 17.57 | -1.34 | 0.78 | 7  | 11 | 450.43  | 0.13  | 4  |
| LjT | Eriodyctiol (flavanone)   | 41.35 | 0.05  | 0.24 | 4  | 6  | 288.27  | 2.03  | 1  |
| LjT | ETHYL FURAN               | 55.07 | 1.68  | 0.01 | 0  | 1  | 96.14   | 1.75  | 1  |
| LjT | Ethyl linolenate          | 46.10 | 1.54  | 0.20 | 0  | 2  | 306.54  | 6.55  | 15 |
| LjT | Ethylpalmitate            | 18.99 | 1.41  | 0.14 | 0  | 2  | 284.54  | 6.97  | 16 |
| LjT | Eudesmol                  | 35.38 | 1.28  | 0.09 | 1  | 1  | 224.43  | 4.10  | 1  |
| LjT | Eugenol                   | 56.24 | 1.35  | 0.04 | 1  | 2  | 164.22  | 2.55  | 3  |

|     |                    |       |       |      |    |    |         |       |    |
|-----|--------------------|-------|-------|------|----|----|---------|-------|----|
| LjT | Farnesene          | 17.42 | 1.95  | 0.05 | 0  | 0  | 204.39  | 5.52  | 7  |
| LjT | Farnesol           | 28.44 | 1.32  | 0.06 | 1  | 1  | 222.41  | 4.76  | 7  |
| LjT | Farnesol acetate   | 21.97 | 1.44  | 0.11 | 0  | 2  | 264.45  | 5.14  | 9  |
| LjT | Flavone der.       | 27.12 | 0.83  | 0.27 | 1  | 5  | 298.31  | 2.84  | 3  |
| LjT | Fulvotomentoside A | 3.30  | -4.60 | 0.02 | 15 | 26 | 1207.52 | -1.65 | 14 |
| LjT | Geraniol           | 23.93 | 1.19  | 0.02 | 1  | 1  | 154.28  | 2.93  | 4  |
| LjT | Germacrene D       | 19.22 | 1.83  | 0.06 | 0  | 0  | 204.39  | 5.14  | 1  |
| LjT | Ginnol             | 11.33 | 1.46  | 0.43 | 1  | 1  | 424.89  | 12.37 | 26 |
| LjT | GLO                | 24.44 | -1.93 | 0.03 | 5  | 6  | 180.18  | -2.68 | 5  |
| LjT | Guaiol             | 38.77 | 1.36  | 0.09 | 1  | 1  | 222.41  | 3.91  | 1  |
| LjT | Hederagenol        | 22.42 | 0.10  | 0.74 | 3  | 4  | 472.78  | 5.33  | 2  |
| LjT | Helixin            | 9.63  | -1.81 | 0.14 | 7  | 12 | 751.07  | 3.24  | 6  |
| LjT | HEPTACOSANE        | 8.18  | 1.88  | 0.36 | 0  | 0  | 380.83  | 12.69 | 24 |
| LjT | Heptadecyloxirane  | 12.44 | 1.67  | 0.15 | 0  | 1  | 282.57  | 7.61  | 16 |
| LjT | Heptenal           | 37.16 | 1.30  | 0.01 | 0  | 1  | 112.19  | 2.29  | 4  |

|     |                        |       |       |      |   |    |        |       |   |
|-----|------------------------|-------|-------|------|---|----|--------|-------|---|
| LjT | Hexadienal             | 38.55 | 1.25  | 0.01 | 0 | 1  | 96.14  | 1.39  | 2 |
| LjT | Hexanal                | 55.71 | 1.25  | 0.01 | 0 | 1  | 100.18 | 1.85  | 4 |
| LjT | Hexenal                | 46.01 | 1.29  | 0.01 | 0 | 1  | 98.16  | 1.83  | 3 |
| LjT | Hexene                 | 60.01 | 1.78  | 0.00 | 0 | 0  | 84.18  | 2.72  | 3 |
| LjT | Hyacinthin             | 38.65 | 1.31  | 0.02 | 0 | 1  | 120.16 | 1.52  | 2 |
| LjT | Hydnocarpin            | 2.06  | -0.13 | 0.94 | 4 | 9  | 464.45 | 3.21  | 4 |
| LjT | Hydroquinone           | 29.26 | 0.89  | 0.02 | 2 | 2  | 110.12 | 1.30  | 0 |
| LjT | HYKOP                  | 32.79 | 0.25  | 0.05 | 3 | 4  | 182.19 | 1.39  | 3 |
| LjT | Hyperin                | 6.94  | -1.42 | 0.77 | 8 | 12 | 464.41 | -0.59 | 4 |
| LjT | Indole                 | 34.38 | 1.81  | 0.03 | 1 | 0  | 117.16 | 2.12  | 0 |
| LjT | Inositol               | 18.86 | -1.52 | 0.05 | 6 | 6  | 180.18 | -3.06 | 0 |
| LjT | Loniceracetalides B    | 5.48  | -1.44 | 0.63 | 4 | 12 | 476.53 | -0.17 | 9 |
| LjT | Loniceracetalides B qt | 61.19 | -0.09 | 0.19 | 1 | 7  | 314.37 | 1.00  | 6 |
| LjT | Isobutyl tiglate       | 24.51 | 1.30  | 0.02 | 0 | 2  | 156.25 | 2.76  | 4 |
| LjT | Isochlorogenic acid C  | 1.78  | -1.32 | 0.69 | 7 | 12 | 516.49 | 1.56  | 9 |

|     |                         |        |       |      |   |    |        |       |    |
|-----|-------------------------|--------|-------|------|---|----|--------|-------|----|
| LjT | Isochlorogenic,acid     | 1.79   | -1.10 | 0.69 | 7 | 12 | 516.49 | 1.56  | 9  |
| LjT | Isothiazole, trimethyl- | 67.44  | 1.42  | 0.02 | 0 | 1  | 127.23 | 1.76  | 0  |
| LjT | Junipene                | 44.07  | 1.82  | 0.11 | 0 | 0  | 204.39 | 4.18  | 0  |
| LjT | Kaempferol              | 41.88  | 0.26  | 0.24 | 4 | 6  | 286.25 | 1.77  | 1  |
| LjT | Kryptoxanthin           | 47.25  | 1.69  | 0.57 | 1 | 1  | 552.96 | 10.76 | 10 |
| LjT | Lauric acid             | 23.59  | 1.02  | 0.04 | 1 | 2  | 200.36 | 4.54  | 10 |
| LjT | L-Bornyl acetate        | 65.52  | 1.29  | 0.08 | 0 | 2  | 196.32 | 2.35  | 2  |
| LjT | Leukol                  | 35.25  | 1.59  | 0.03 | 0 | 1  | 129.17 | 2.02  | 0  |
| LjT | Lignoceric acid         | 14.90  | 1.24  | 0.33 | 1 | 2  | 368.72 | 10.02 | 22 |
| LjT | Linalool                | 49.37  | 0.86  | 0.04 | 1 | 2  | 170.28 | 1.43  | 4  |
| LjT | LINALOOL (D)            | 38.29  | 1.29  | 0.02 | 1 | 1  | 154.28 | 2.74  | 4  |
| LjT | Loganic                 | 34.96  | -0.58 | 0.05 | 4 | 5  | 176.19 | -0.59 | 1  |
| LjT | Loganic acid            | 4.92   | -1.81 | 0.40 | 6 | 10 | 376.40 | -2.33 | 4  |
| LjT | Loganic acid Qt         | 114.65 | -0.59 | 0.09 | 3 | 5  | 214.24 | -0.58 | 1  |
| LjT | Loganin                 | 5.90   | -1.48 | 0.44 | 5 | 10 | 390.43 | -2.08 | 5  |



|     |                                                                                                          |       |       |      |    |    |         |       |    |
|-----|----------------------------------------------------------------------------------------------------------|-------|-------|------|----|----|---------|-------|----|
| LjT | Loniceracetalide A                                                                                       | 28.29 | -1.31 | 0.58 | 4  | 11 | 460.53  | -1.16 | 8  |
| LjT | Loniceracetalide A_qt                                                                                    | 89.38 | -0.30 | 0.17 | 1  | 6  | 298.37  | 0.59  | 5  |
| LjT | Loniceracetalide B                                                                                       | 10.77 | -1.37 | 0.58 | 4  | 11 | 460.53  | -1.16 | 8  |
| LjT | Loniceracetalide B_qt                                                                                    | 89.28 | 0.16  | 0.17 | 1  | 6  | 298.37  | 0.59  | 5  |
| LjT | Luteolin                                                                                                 | 36.16 | 0.19  | 0.25 | 4  | 6  | 286.25  | 2.07  | 1  |
| LjT | Luteolin-7-o-glucoside                                                                                   | 7.29  | -1.23 | 0.78 | 7  | 11 | 448.41  | 0.16  | 4  |
| LjT | Macranthoidin A                                                                                          | 4.15  | -4.97 | 0.01 | 16 | 27 | 1237.55 | -2.16 | 15 |
| LjT | Macranthoidin B                                                                                          | 6.69  | -5.80 | 0.01 | 19 | 32 | 1399.71 | -3.91 | 18 |
| LjT | Madreselvin A                                                                                            | 6.03  | -2.50 | 0.59 | 10 | 17 | 640.60  | -2.08 | 8  |
| LjT | Madreselvin B                                                                                            | 3.01  | -2.42 | 0.26 | 12 | 20 | 788.72  | -0.36 | 11 |
| LjT | Mandenol                                                                                                 | 42.00 | 1.46  | 0.19 | 0  | 2  | 308.56  | 6.99  | 16 |
| LjT | Methional                                                                                                | 53.62 | 1.04  | 0.00 | 0  | 1  | 104.19  | 0.55  | 3  |
| LjT | methyl (1R,4aS,6S,7R,7aS)-1,6-dihydroxy-7-methyl-1,4a,5,6,7,7a-hexahydrocyclopenta[d]pyran-4-carboxylate | 29.99 | -0.36 | 0.10 | 2  | 5  | 228.27  | -0.33 | 2  |
| LjT | Methyl caffeate                                                                                          | 30.68 | 0.54  | 0.06 | 2  | 4  | 194.20  | 1.62  | 3  |

|     |                                |       |       |      |   |   |        |       |    |
|-----|--------------------------------|-------|-------|------|---|---|--------|-------|----|
| LjT | Methyl chlorogenate            | 9.97  | -0.74 | 0.36 | 5 | 9 | 368.37 | -0.16 | 6  |
| LjT | Methyl isomyristate            | 20.26 | 1.38  | 0.08 | 0 | 2 | 242.45 | 5.50  | 12 |
| LjT | METHYL LINOLEATE               | 41.93 | 1.44  | 0.17 | 0 | 2 | 294.53 | 6.64  | 15 |
| LjT | Methyl myristate               | 19.68 | 1.36  | 0.08 | 0 | 2 | 242.45 | 5.71  | 13 |
| LjT | Methyl octadeca-8,11-dienoate  | 41.93 | 1.46  | 0.17 | 0 | 2 | 294.53 | 6.64  | 15 |
| LjT | Methyl palmitate               | 18.09 | 1.37  | 0.12 | 0 | 2 | 270.51 | 6.62  | 15 |
| LjT | Methyl-9-methyl tetradecanoate | 13.70 | 1.35  | 0.09 | 0 | 2 | 256.48 | 5.96  | 13 |
| LjT | Methylinolenate                | 46.15 | 1.48  | 0.17 | 0 | 2 | 292.51 | 6.20  | 14 |
| LjT | Methyl-p-coumarate             | 20.14 | 0.83  | 0.05 | 1 | 3 | 178.20 | 1.89  | 3  |
| LjT | Muurolene                      | 19.50 | 1.84  | 0.08 | 0 | 0 | 204.39 | 4.75  | 1  |
| LjT | Myristic acid                  | 21.18 | 1.07  | 0.07 | 1 | 2 | 228.42 | 5.46  | 12 |
| LjT | Neochlorogenic acid            | 10.65 | -1.43 | 0.33 | 5 | 9 | 353.33 | -1.09 | 5  |
| LjT | Nerol                          | 35.66 | 1.15  | 0.02 | 1 | 1 | 154.28 | 2.93  | 4  |
| LjT | Neryl acetate                  | 57.47 | 1.25  | 0.04 | 0 | 2 | 196.32 | 3.31  | 6  |
| LjT | NON                            | 26.74 | 0.96  | 0.03 | 1 | 2 | 172.30 | 3.63  | 8  |

|     |                                                                                                                                                             |       |       |      |   |    |        |       |    |
|-----|-------------------------------------------------------------------------------------------------------------------------------------------------------------|-------|-------|------|---|----|--------|-------|----|
| LjT | Nonacosanol                                                                                                                                                 | 10.57 | 1.48  | 0.43 | 1 | 1  | 424.89 | 12.38 | 27 |
| LjT | Nonanal                                                                                                                                                     | 40.28 | 1.31  | 0.02 | 0 | 1  | 142.27 | 3.22  | 7  |
| LjT | Nonanoic acid                                                                                                                                               | 40.51 | 0.92  | 0.02 | 1 | 2  | 158.27 | 3.17  | 7  |
| LjT | Ochnaflavone                                                                                                                                                | 2.54  | -0.11 | 0.57 | 5 | 10 | 538.48 | 4.67  | 4  |
| LjT | Octadecylglycol                                                                                                                                             | 16.18 | 1.07  | 0.19 | 1 | 2  | 314.62 | 7.23  | 19 |
| LjT | Octanol                                                                                                                                                     | 21.06 | 1.16  | 0.01 | 1 | 1  | 130.26 | 2.80  | 6  |
| LjT | Olean-12-en-28-oic acid, 23-hydroxy-3-((O-beta-D-xylopyranosyl-(1-3)-O-6-deoxy-alpha-L-mannopyranosyl-(1-2)-alpha-L-arabinopyranosyl)oxy)-, (3beta,4alpha)- | 3.74  | -2.34 | 0.06 | 9 | 16 | 883.20 | 2.00  | 8  |
| LjT | Oleanolic acid                                                                                                                                              | 29.02 | 0.59  | 0.76 | 2 | 3  | 456.78 | 6.42  | 1  |
| LjT | o-Thymol                                                                                                                                                    | 43.28 | 1.58  | 0.03 | 1 | 1  | 150.24 | 3.24  | 1  |
| LjT | p-Coumaric acid                                                                                                                                             | 43.29 | 0.46  | 0.04 | 2 | 3  | 164.17 | 1.64  | 2  |
| LjT | PEL                                                                                                                                                         | 44.03 | 1.11  | 0.02 | 1 | 1  | 122.18 | 1.55  | 2  |
| LjT | Pent-3-en-2-one                                                                                                                                             | 50.20 | 1.25  | 0.00 | 0 | 1  | 84.13  | 0.86  | 1  |
| LjT | Pentadecene                                                                                                                                                 | 17.72 | 1.84  | 0.05 | 0 | 0  | 210.45 | 6.82  | 12 |

|     |                               |       |       |      |   |    |        |       |    |
|-----|-------------------------------|-------|-------|------|---|----|--------|-------|----|
| LjT | PHB                           | 30.15 | 0.39  | 0.03 | 2 | 3  | 138.13 | 1.17  | 1  |
| LjT | PHYTANTRIOL                   | 23.20 | 0.45  | 0.18 | 3 | 3  | 330.62 | 5.47  | 14 |
| LjT | Phytofluene                   | 43.18 | 2.29  | 0.50 | 0 | 0  | 543.02 | 14.10 | 19 |
| LjT | Prenal                        | 48.87 | 1.23  | 0.00 | 0 | 1  | 84.13  | 1.36  | 1  |
| LjT | Propyl vinyl ketone           | 72.27 | 1.35  | 0.01 | 0 | 1  | 98.16  | 1.58  | 3  |
| LjT | Protocatechuic acid           | 25.37 | 0.10  | 0.04 | 3 | 4  | 154.13 | 0.90  | 1  |
| LjT | PTL                           | 59.53 | 1.21  | 0.00 | 0 | 1  | 86.15  | 1.40  | 3  |
| LjT | Quercetin-3-o- $\beta$ -D-glu | 1.81  | -1.40 | 0.79 | 8 | 13 | 478.39 | -0.38 | 4  |
| LjT | Quinic acid                   | 55.92 | -1.79 | 0.06 | 4 | 6  | 191.18 | -3.07 | 1  |
| LjT | Rhoifolin                     | 6.68  | -1.87 | 0.77 | 8 | 14 | 578.57 | -0.43 | 6  |
| LjT | SCG                           | 23.59 | -1.58 | 0.36 | 4 | 10 | 388.41 | -1.98 | 8  |
| LjT | Scolymoside                   | 3.84  | -2.16 | 0.73 | 9 | 15 | 594.57 | -0.70 | 6  |
| LjT | Secologanate                  | 17.56 | -1.90 | 0.33 | 5 | 10 | 374.38 | -2.23 | 7  |
| LjT | Secologanic acid qt           | 73.14 | -0.51 | 0.07 | 2 | 5  | 212.22 | -0.49 | 4  |
| LjT | Secologanic dibutylacetal     | 20.05 | -0.97 | 0.67 | 4 | 11 | 546.73 | 1.84  | 18 |

|     |                                  |       |       |      |   |    |        |       |    |
|-----|----------------------------------|-------|-------|------|---|----|--------|-------|----|
| LjT | Secologanic dibutylacetal_qt     | 53.65 | 0.34  | 0.29 | 1 | 6  | 384.57 | 3.58  | 15 |
| LjT | Secologanin dimethylacetal_qt    | 2.71  | -0.07 | 0.11 | 1 | 6  | 272.33 | 0.01  | 7  |
| LjT | Secologanin_qt                   | 33.33 | -0.10 | 0.08 | 1 | 5  | 226.25 | -0.23 | 5  |
| LjT | Secologanoside                   | 26.92 | -2.31 | 0.37 | 4 | 11 | 388.36 | -3.64 | 7  |
| LjT | Secologanoside 7-methylester     | 3.88  | -1.66 | 0.45 | 5 | 12 | 420.41 | -1.04 | 9  |
| LjT | Secologanoside 7-methylester_qt  | 38.01 | -0.37 | 0.11 | 2 | 7  | 258.25 | 0.13  | 6  |
| LjT | Secologanoside_qt                | 79.21 | -1.53 | 0.09 | 1 | 6  | 226.20 | -1.89 | 4  |
| LjT | Secoxyloganin                    | 3.79  | -1.63 | 0.39 | 5 | 11 | 404.41 | -2.03 | 5  |
| LjT | Secoxyloganin_qt                 | 34.80 | -0.32 | 0.09 | 2 | 6  | 242.25 | -0.28 | 1  |
| LjT | Sitogluside                      | 20.63 | -0.14 | 0.62 | 4 | 6  | 576.95 | 6.34  | 9  |
| LjT | Stigmasterol                     | 43.83 | 1.44  | 0.76 | 1 | 1  | 412.77 | 7.64  | 5  |
| LjT | Stigmasterol- $\beta$ -glucoside | 2.40  | -0.23 | 0.63 | 4 | 6  | 574.93 | 5.89  | 8  |
| LjT | Succinic acid                    | 29.62 | -0.44 | 0.01 | 2 | 4  | 118.10 | -0.41 | 3  |
| LjT | Sulcatone                        | 26.36 | 1.35  | 0.01 | 0 | 1  | 126.22 | 1.79  | 3  |
| LjT | Sweroside aglycone               | 68.68 | 0.15  | 0.08 | 1 | 4  | 196.22 | 0.15  | 1  |

|     |                   |       |       |      |   |    |        |       |    |
|-----|-------------------|-------|-------|------|---|----|--------|-------|----|
| LjT | Tetradecane       | 15.94 | 1.79  | 0.04 | 0 | 0  | 198.44 | 6.76  | 11 |
| LjT | Thymol            | 41.47 | 1.60  | 0.03 | 1 | 1  | 150.24 | 3.24  | 1  |
| LjT | Tricin            | 27.86 | 0.51  | 0.34 | 3 | 7  | 330.31 | 2.30  | 3  |
| LjT | Ursolic acid      | 16.77 | 0.67  | 0.75 | 2 | 3  | 456.78 | 6.47  | 1  |
| LjT | Vogeloside        | 5.62  | -1.17 | 0.46 | 4 | 10 | 388.41 | -1.78 | 5  |
| LjT | WLN: NCR B1       | 55.48 | 1.61  | 0.02 | 0 | 1  | 117.16 | 2.19  | 0  |
| LjT | WLN: QR BQ DQ     | 22.93 | 0.59  | 0.02 | 3 | 3  | 126.12 | 1.03  | 0  |
| LjT | WLN: VHR          | 32.63 | 1.32  | 0.01 | 0 | 1  | 106.13 | 1.59  | 1  |
| LjT | XYLOSTOSIDINE     | 43.17 | -1.07 | 0.64 | 4 | 9  | 415.51 | -1.66 | 4  |
| LjT | XYLOSTOSIDINE_qt  | 4.01  | 0.34  | 0.15 | 1 | 4  | 253.35 | 0.09  | 1  |
| LjT | Zeaxanthin        | 21.17 | 1.22  | 0.54 | 2 | 2  | 568.96 | 9.53  | 10 |
| LjT | ZINC03978781      | 43.83 | 1.32  | 0.76 | 1 | 1  | 412.77 | 7.64  | 5  |
| LjT | Zingiberene       | 18.80 | 1.91  | 0.06 | 0 | 0  | 204.39 | 5.08  | 4  |
| LjT | $\alpha$ cadinene | 18.73 | 1.85  | 0.08 | 0 | 0  | 204.39 | 4.75  | 1  |

|         |                        |       |       |      |    |    |        |       |   |
|---------|------------------------|-------|-------|------|----|----|--------|-------|---|
| LjT     | $\alpha$ -Cubebene     | 16.73 | 1.83  | 0.11 | 0  | 0  | 204.39 | 4.17  | 1 |
| LjT     | $\beta$ -Carotene      | 37.18 | 2.25  | 0.58 | 0  | 0  | 536.96 | 12.00 | 1 |
| LjT     | $\beta$ -Citronellol   | 38.89 | 1.20  | 0.02 | 1  | 1  | 156.30 | 3.05  | 5 |
| LjT     | $\beta$ -Cubebene      | 32.81 | 1.83  | 0.11 | 0  | 0  | 204.39 | 4.22  | 1 |
| LjT     | $\beta$ -Rhodinol      | 38.05 | 1.19  | 0.02 | 1  | 1  | 156.30 | 3.05  | 5 |
| LjT     | $\gamma$ -Muurolene    | 21.53 | 1.84  | 0.08 | 0  | 0  | 204.39 | 4.80  | 1 |
| LjT     | $\delta$ -Amorphene    | 17.95 | 1.85  | 0.08 | 0  | 0  | 204.39 | 4.94  | 1 |
| LjT/AcT | Furol                  | 34.35 | 1.08  | 0.01 | 0  | 2  | 96.09  | 0.99  | 1 |
| LjT/AcT | Heriguard              | 11.93 | -1.03 | 0.33 | 6  | 9  | 354.34 | -0.42 | 5 |
| LjT/AcT | Quercetin              | 46.43 | 0.05  | 0.28 | 5  | 7  | 302.25 | 1.50  | 1 |
| LjT/AcT | Rutin                  | 3.20  | -1.93 | 0.68 | 10 | 16 | 610.57 | -1.45 | 6 |
| LjT/AcT | $\beta$ -caryophyllene | 29.70 | 1.83  | 0.09 | 0  | 0  | 204.39 | 4.75  | 0 |
| LjT/AcT | $\beta$ -Elemene       | 25.63 | 1.84  | 0.06 | 0  | 0  | 204.39 | 4.79  | 3 |

|            |                                                                                                  |       |      |      |   |   |        |      |    |
|------------|--------------------------------------------------------------------------------------------------|-------|------|------|---|---|--------|------|----|
| LjT/AcT/Cm | $\beta$ -Sitosterol                                                                              | 36.91 | 1.32 | 0.75 | 1 | 1 | 414.79 | 8.08 | 6  |
| LjT/Cm     | Palmitic acid                                                                                    | 19.30 | 1.09 | 0.10 | 1 | 2 | 256.48 | 6.37 | 14 |
| AcT        | (-)-nopinene                                                                                     | 44.84 | 1.80 | 0.05 | 0 | 0 | 136.26 | 2.93 | 0  |
| AcT        | (2R,3R)-3,5-dihydroxy-2-(4-hydroxyphenyl)-7-methoxychroman-4-one                                 | 24.84 | 0.14 | 0.26 | 3 | 6 | 302.30 | 2.00 | 2  |
| AcT        | (E)-3-[4-hydroxy-3-[(E)-4-hydroxy-3-methyl-but-2-enyl]-5-(3-methylbut-2-enyl)phenyl]acrylic acid | 23.76 | 0.41 | 0.19 | 3 | 4 | 316.43 | 4.26 | 7  |
| AcT        | (E)-3-[4-hydroxy-3-[(Z)-4-hydroxy-3-methyl-but-2-enyl]-5-(3-methylbut-2-enyl)phenyl]acrylic acid | 12.86 | 0.35 | 0.19 | 3 | 4 | 316.43 | 4.26 | 7  |
| AcT        | (L)-alpha-Terpineol                                                                              | 48.80 | 1.39 | 0.03 | 1 | 1 | 154.28 | 2.42 | 1  |
| AcT        | 2-NONANONE                                                                                       | 8.51  | 1.34 | 0.02 | 0 | 1 | 142.27 | 2.70 | 6  |
| AcT        | 4'-Methylcapillarisin                                                                            | 72.18 | 0.57 | 0.35 | 2 | 7 | 330.31 | 3.06 | 6  |
| AcT        | 5-Hydroxyferulate                                                                                | 59.99 | 0.24 | 0.07 | 3 | 5 | 210.20 | 1.35 | 3  |
| AcT        | 7-Methylcapillarisin                                                                             | 5.08  | 0.51 | 0.34 | 2 | 7 | 330.31 | 3.06 | 4  |
| AcT        | Arcapillin                                                                                       | 48.96 | 0.60 | 0.41 | 3 | 8 | 360.34 | 2.29 | 4  |
| AcT        | Artepillin A                                                                                     | 68.32 | 0.45 | 0.24 | 2 | 4 | 316.43 | 3.82 | 6  |



|     |                       |       |       |      |   |   |        |      |   |
|-----|-----------------------|-------|-------|------|---|---|--------|------|---|
| AcT | Artepillin C          | 38.39 | 0.83  | 0.17 | 2 | 3 | 300.43 | 5.35 | 6 |
| AcT | Ayapanin              | 41.55 | 0.97  | 0.06 | 0 | 3 | 176.18 | 1.88 | 1 |
| AcT | Azelex                | 16.90 | -0.04 | 0.04 | 2 | 4 | 188.25 | 1.87 | 8 |
| AcT | Butal                 | 68.66 | 1.18  | 0.00 | 0 | 1 | 72.12  | 0.94 | 2 |
| AcT | Capillanol            | 62.02 | 1.29  | 0.04 | 1 | 1 | 174.26 | 2.97 | 2 |
| AcT | Capillarin            | 87.01 | 1.36  | 0.08 | 0 | 2 | 198.23 | 3.00 | 1 |
| AcT | Capillarisin          | 57.56 | 0.49  | 0.31 | 3 | 7 | 316.28 | 2.81 | 3 |
| AcT | Capillarol            | 37.41 | 0.54  | 0.12 | 1 | 4 | 260.31 | 3.17 | 5 |
| AcT | Capillene             | 47.19 | 2.11  | 0.03 | 0 | 0 | 154.22 | 3.95 | 1 |
| AcT | Capillin              | 52.44 | 1.50  | 0.04 | 0 | 1 | 168.20 | 3.38 | 1 |
| AcT | Car-3-ene             | 45.15 | 1.85  | 0.04 | 0 | 0 | 136.26 | 2.87 | 0 |
| AcT | Cirsilineol           | 4.81  | 0.77  | 0.37 | 2 | 7 | 344.34 | 2.55 | 4 |
| AcT | Cirsimaritin          | 30.35 | 0.72  | 0.30 | 2 | 6 | 314.31 | 2.57 | 3 |
| AcT | Demethoxycapillarisin | 52.33 | 0.31  | 0.25 | 3 | 6 | 286.25 | 2.83 | 2 |
| AcT | D-limonene            | 38.80 | 1.82  | 0.02 | 0 | 0 | 136.26 | 3.50 | 1 |

|     |                                           |       |       |      |   |    |        |       |   |
|-----|-------------------------------------------|-------|-------|------|---|----|--------|-------|---|
| AcT | Eugenol                                   | 56.24 | 1.35  | 0.04 | 1 | 2  | 164.22 | 2.55  | 3 |
| AcT | Eupalitin                                 | 46.11 | 0.62  | 0.33 | 3 | 7  | 330.31 | 2.01  | 3 |
| AcT | Eupatolitin                               | 42.55 | 0.16  | 0.37 | 4 | 8  | 346.31 | 1.74  | 3 |
| AcT | Genkwanin                                 | 37.13 | 0.63  | 0.24 | 2 | 5  | 284.28 | 2.59  | 2 |
| AcT | Hirsutrin                                 | 1.86  | -1.66 | 0.77 | 8 | 12 | 464.41 | -0.59 | 4 |
| AcT | Isoarcapillin                             | 57.40 | 0.40  | 0.41 | 3 | 8  | 360.34 | 2.29  | 4 |
| AcT | Isorhamnetin                              | 49.60 | 0.31  | 0.31 | 4 | 7  | 316.28 | 1.76  | 2 |
| AcT | Isorhamnetin-3-mono- $\beta$ -D-glucoside | 4.11  | -1.35 | 0.80 | 7 | 12 | 478.44 | -0.34 | 5 |
| AcT | Isorhamnetin-3-O-glucoside                | 1.17  | -1.24 | 0.80 | 7 | 12 | 478.44 | -0.34 | 5 |
| AcT | Isoscopoletin                             | 23.46 | 0.71  | 0.08 | 1 | 4  | 192.18 | 1.62  | 1 |
| AcT | Methyleugenol                             | 73.36 | 1.47  | 0.04 | 0 | 2  | 178.25 | 2.81  | 4 |
| AcT | Neocapillene                              | 24.45 | 2.09  | 0.03 | 0 | 0  | 154.22 | 3.95  | 0 |
| AcT | Norcapillene                              | 38.06 | 2.03  | 0.03 | 0 | 0  | 140.19 | 4.00  | 1 |
| AcT | OXL                                       | 29.68 | -0.64 | 0.01 | 2 | 4  | 90.04  | -0.48 | 1 |
| AcT | Penta-1,3-diynylbenzene                   | 15.35 | 2.07  | 0.03 | 0 | 0  | 140.19 | 3.50  | 0 |

|     |                                                               |       |       |      |   |   |        |       |    |
|-----|---------------------------------------------------------------|-------|-------|------|---|---|--------|-------|----|
| AcT | Piceol                                                        | 36.80 | 0.87  | 0.03 | 1 | 2 | 136.16 | 1.30  | 1  |
| AcT | Rhamnocitrin                                                  | 12.90 | 0.48  | 0.27 | 3 | 6 | 300.28 | 2.02  | 2  |
| AcT | Salicylic acid                                                | 32.13 | 0.63  | 0.03 | 2 | 3 | 138.13 | 1.17  | 1  |
| AcT | Scoparone                                                     | 74.75 | 0.85  | 0.09 | 0 | 4 | 206.21 | 1.87  | 2  |
| AcT | Scopoletin                                                    | 27.32 | 0.73  | 0.08 | 1 | 4 | 192.18 | 1.62  | 1  |
| AcT | Scopoletol                                                    | 27.77 | 0.71  | 0.08 | 1 | 4 | 192.18 | 1.62  | 1  |
| AcT | Vanillin                                                      | 52.00 | 0.68  | 0.03 | 1 | 3 | 152.16 | 1.31  | 2  |
| AcT | $\alpha$ -Humulene                                            | 39.81 | 1.87  | 0.06 | 0 | 0 | 204.39 | 5.04  | 0  |
| Cm  | (2R,3R,4S)-2-(6-aminopurin-9-yl)-4-(hydroxymethyl)oxolan-3-ol | 38.44 | -0.90 | 0.16 | 4 | 7 | 251.28 | -1.48 | 2  |
| Cm  | (2R,3S,5S)-5-(6-aminopurin-9-yl)-2-(hydroxymethyl)oxolan-3-ol | 30.13 | -1.10 | 0.15 | 4 | 7 | 251.28 | -1.25 | 2  |
| Cm  | 20-Hexadecanoylengenol                                        | 28.20 | 0.30  | 0.68 | 3 | 6 | 586.94 | 7.38  | 17 |
| Cm  | Adenine                                                       | 62.81 | -0.30 | 0.03 | 3 | 4 | 135.15 | -0.58 | 0  |
| Cm  | Arachidonic acid                                              | 45.57 | 1.20  | 0.20 | 1 | 2 | 304.52 | 6.41  | 14 |
| Cm  | Caffeine                                                      | 89.46 | 0.58  | 0.08 | 0 | 5 | 194.22 | -0.10 | 0  |

|    |                       |       |       |      |    |    |        |       |    |
|----|-----------------------|-------|-------|------|----|----|--------|-------|----|
| Cm | Cerevisterol          | 39.52 | 0.35  | 0.77 | 3  | 3  | 432.76 | 5.26  | 4  |
| Cm | Cholesteryl palmitate | 31.05 | 1.45  | 0.45 | 0  | 2  | 625.19 | 14.35 | 21 |
| Cm | Cinnamaldehyde        | 31.99 | 1.35  | 0.02 | 0  | 1  | 132.17 | 1.95  | 2  |
| Cm | CLR                   | 37.87 | 1.43  | 0.68 | 1  | 1  | 386.73 | 7.38  | 5  |
| Cm | Cordycedipeptide A    | 63.12 | -0.34 | -    | 4  | 6  | 227.30 | -0.65 | 4  |
| Cm | Cordycepin            | 36.83 | -1.13 | -    | 4  | 7  | 251.28 | -1.45 | 2  |
| Cm | Cordylagenin          | 17.36 | 0.34  | 0.78 | 2  | 4  | 432.71 | 3.66  | 0  |
| Cm | D-Mannoheptulose      | 29.74 | -2.02 | 0.05 | 6  | 7  | 210.21 | -3.20 | 6  |
| Cm | EIC                   | 41.90 | 1.16  | 0.14 | 1  | 2  | 280.50 | 6.39  | 14 |
| Cm | Ergosterol            | 14.29 | 1.47  | 0.72 | 1  | 1  | 396.72 | 6.93  | 4  |
| Cm | Galactomannan         | 10.92 | -3.92 | 0.70 | 11 | 16 | 504.50 | -6.01 | 7  |
| Cm | GLB                   | 47.71 | -1.89 | 0.04 | 5  | 6  | 180.18 | -2.51 | 1  |
| Cm | GUP                   | 43.04 | -1.82 | 0.04 | 5  | 6  | 180.18 | -2.51 | 1  |
| Cm | Isoergotamine         | 8.10  | 0.32  | 0.21 | 3  | 9  | 581.73 | 3.12  | 4  |
| Cm | LFA                   | 8.46  | 1.83  | 0.13 | 0  | 0  | 282.62 | 9.50  | 17 |

|    |                  |       |       |      |   |    |        |       |    |
|----|------------------|-------|-------|------|---|----|--------|-------|----|
| Cm | Linoleic         | 41.90 | 1.23  | 0.14 | 1 | 2  | 280.50 | 6.39  | 14 |
| Cm | Linoleyl acetate | 42.10 | 1.36  | 0.20 | 0 | 2  | 308.56 | 6.85  | 16 |
| Cm | MTL              | 17.73 | -1.58 | 0.03 | 6 | 6  | 182.20 | -2.94 | 5  |
| Cm | NCA              | 71.13 | 0.44  | 0.02 | 2 | 3  | 122.14 | -0.32 | 1  |
| Cm | Nicotinic acid   | 47.65 | 0.34  | 0.02 | 1 | 3  | 123.12 | 0.28  | 1  |
| Cm | Oleic acid       | 33.13 | 1.14  | 0.14 | 1 | 2  | 282.52 | 6.84  | 15 |
| Cm | Peroxyergosterol | 44.39 | 0.86  | 0.82 | 1 | 3  | 428.72 | 6.73  | 4  |
| Cm | Stearic acid     | 17.83 | 1.15  | 0.14 | 1 | 2  | 284.54 | 7.28  | 16 |
| Cm | Styrone          | 38.35 | 1.14  | 0.02 | 1 | 1  | 134.19 | 1.69  | 2  |
| Cm | TGL              | 15.13 | 0.54  | 0.13 | 0 | 6  | 891.67 | 22.26 | 56 |
| Cm | Thiamine         | 19.87 | -0.32 | 0.11 | 3 | 4  | 265.40 | -0.05 | 4  |
| Cm | TRE              | 2.32  | -3.08 | 0.24 | 8 | 11 | 342.34 | -4.26 | 4  |
| Cm | Uracil           | 42.53 | 0.05  | 0.02 | 2 | 4  | 112.10 | -1.01 | 0  |
| Cm | Uralene          | 11.70 | 0.63  | 0.49 | 4 | 7  | 384.41 | 3.43  | 4  |
| Cm | Uridine          | 10.49 | -1.14 | 0.11 | 4 | 8  | 244.23 | -2.45 | 2  |

|    |           |       |       |      |   |    |        |       |   |
|----|-----------|-------|-------|------|---|----|--------|-------|---|
| Cm | Vitamin C | 13.34 | -0.86 | 0.04 | 4 | 6  | 176.14 | -1.76 | 2 |
| Cm | Vitamin G | 6.79  | -1.22 | 0.50 | 5 | 10 | 376.41 | 0.23  | 5 |

---

LjT, *Lonicera japonica* Thunberg; AcT, *Artemisia capillaris* Thunberg; Cm, *Cordyceps militaris*; MW, molecular weight; OB, oral bioavailability; Caco-2, Caco-2 cell permeability; DL, drug-likeness score; Hdon, number of hydrogen bond donors; Hacc, number of hydrogen bond acceptors; MW, molecular weight; AlogP, octanol-water partition coefficient log P; RBN, number of rotatable bonds.

**Supplementary Table S2. List of the active chemical compounds in FDY003.**

| Herbal medicines | Compound                | OB    | Caco-2 | DL   | Hdon | Hacc | MW     | AlogP | RBN |
|------------------|-------------------------|-------|--------|------|------|------|--------|-------|-----|
| LjT              | Chrysoeriol             | 35.85 | 0.39   | 0.27 | 3    | 6    | 300.28 | 2.32  | 2   |
| LjT              | Corymbosin              | 51.96 | 0.88   | 0.41 | 1    | 7    | 358.37 | 2.80  | 5   |
| LjT              | Eriodyctiol (flavanone) | 41.35 | 0.05   | 0.24 | 4    | 6    | 288.27 | 2.03  | 1   |
| LjT              | Loniceracetalides B qt  | 61.19 | -0.09  | 0.19 | 1    | 7    | 314.37 | 1.00  | 6   |
| LjT              | Kaempferol              | 41.88 | 0.26   | 0.24 | 4    | 6    | 286.25 | 1.77  | 1   |
| LjT              | Luteolin                | 36.16 | 0.19   | 0.25 | 4    | 6    | 286.25 | 2.07  | 1   |
| LjT/AcT          | Quercetin               | 46.43 | 0.05   | 0.28 | 5    | 7    | 302.25 | 1.50  | 1   |
| LjT/AcT/Cm       | $\beta$ -Sitosterol     | 36.91 | 1.32   | 0.75 | 1    | 1    | 414.79 | 8.08  | 6   |
| AcT              | 4'-Methylcapillarisin   | 72.18 | 0.57   | 0.35 | 2    | 7    | 330.31 | 3.06  | 6   |
| AcT              | Arcapillin              | 48.96 | 0.60   | 0.41 | 3    | 8    | 360.34 | 2.29  | 4   |
| AcT              | Artepillin A            | 68.32 | 0.45   | 0.24 | 2    | 4    | 316.43 | 3.82  | 6   |
| AcT              | Capillarisin            | 57.56 | 0.49   | 0.31 | 3    | 7    | 316.28 | 2.81  | 3   |
| AcT              | Cirsimaritin            | 30.35 | 0.72   | 0.30 | 2    | 6    | 314.31 | 2.57  | 3   |

|     |                       |       |       |      |   |   |        |       |   |
|-----|-----------------------|-------|-------|------|---|---|--------|-------|---|
| AcT | Demethoxycapillarisin | 52.33 | 0.31  | 0.25 | 3 | 6 | 286.25 | 2.83  | 2 |
| AcT | Eupalitin             | 46.11 | 0.62  | 0.33 | 3 | 7 | 330.31 | 2.01  | 3 |
| AcT | Eupatolitin           | 42.55 | 0.16  | 0.37 | 4 | 8 | 346.31 | 1.74  | 3 |
| AcT | Genkwanin             | 37.13 | 0.63  | 0.24 | 2 | 5 | 284.28 | 2.59  | 2 |
| AcT | Isoarcapillin         | 57.40 | 0.40  | 0.41 | 3 | 8 | 360.34 | 2.29  | 4 |
| AcT | Isorhamnetin          | 49.60 | 0.31  | 0.31 | 4 | 7 | 316.28 | 1.76  | 2 |
| Cm  | Cordycepin            | 36.83 | -1.13 | -    | 4 | 7 | 251.28 | -1.45 | 2 |

---

LjT, *Lonicera japonica* Thunberg; AcT, *Artemisia capillaris* Thunberg; Cm, *Cordyceps militaris*; MW, molecular weight; OB, oral bioavailability; Caco-2, Caco-2 cell permeability; DL, drug-likeness score; Hdon, number of hydrogen bond donors; Hacc, number of hydrogen bond acceptors; MW, molecular weight; AlogP, octanol-water partition coefficient log P; RBN, number of rotatable bonds.



**Supplementary Table S3. List of the targets of active chemical compounds in FDY003.**

| Herbal medicines | Compound                   | Targets                                                                                                                                                                                                                                                                                                                                                                                                                                                                                                                                                                                                                                                                                      |
|------------------|----------------------------|----------------------------------------------------------------------------------------------------------------------------------------------------------------------------------------------------------------------------------------------------------------------------------------------------------------------------------------------------------------------------------------------------------------------------------------------------------------------------------------------------------------------------------------------------------------------------------------------------------------------------------------------------------------------------------------------|
| LjT              | Chrysoeriol                | ABCC1*, CREB1*, CYP1B1*, PTPRS*, XDH*                                                                                                                                                                                                                                                                                                                                                                                                                                                                                                                                                                                                                                                        |
| LjT              | Corymbosin                 | ABCG2*, CREB1*, CYP1B1*, PTPRS*                                                                                                                                                                                                                                                                                                                                                                                                                                                                                                                                                                                                                                                              |
| LjT              | Eriodyctiol<br>(flavanone) | ABCC1*, CA4*, CA7, CA12*, CBR1, CYP1A2*, CYP1B1*, CYP3A4*, CYP19A1*,<br>HSD17B1*, PGF*, SHBG*, TAS2R31*                                                                                                                                                                                                                                                                                                                                                                                                                                                                                                                                                                                      |
| LjT              | Kaempferol                 | ABCB1*, ABCC1*, ABCG2*, AHR*, AKR1B1, ALOX5, AR*, BCHE*, CA2*, CA7, CA12*,<br>CDK1*, CISD1, CTDSP1, CYP1A2*, CYP1B1*, CYP2D6*, DAPK1*, EGFR*, ESR1*,<br>ESRRA*, F2*, FLT3*, HCK*, HSD17B1*, HSD17B2*, MPO*, NOX4, NR1I2*, P4HB,<br>PIM1*, PTPRS*, SLC2A1*, TYR, UGT3A1, XDH*                                                                                                                                                                                                                                                                                                                                                                                                                 |
| LjT              | Luteolin                   | ABCG2*, ADORA1*, AKR1B1, AKR1B10, ALOX5, ALOX15, APP, ARG1, CA2*, CA4*,<br>CA7, CA12*, CASP3*, CCNB1*, CCNB2*, CCNB3*, CD38*, CDK1*, CDK2*, CDK5R1,<br>CDK6*, CREB1*, CSNK2A2*, CSNK2B*, CYP1A2*, CYP1B1*, FLT3*, FOS*, GLO1*,<br>GPR35, GSK3B*, JUN*, MAOA*, MAPK8*, MMP12*, MMP2*, MMP9*, NOX4, PARP1*,<br>PTPRS*, SYK*, TNKS*, TNKS2*, TOP1*, TTR, XDH*                                                                                                                                                                                                                                                                                                                                   |
| LjT/AcT          | Quercetin                  | ABCB1*, ABCC1*, ABCG2*, ADORA1*, ADORA2A*, AKR1A1, AKR1B1, AKR1C1*,<br>AKR1C2, AKR1C3, AKR1C4, AKT1*, ALK*, ALOX5, ALOX12*, ALOX15, AR*, ATP5A1,<br>ATP5B, ATP5C1, AURKB*, AVPR2*, AXL*, BACE1*, CA1*, CA2*, CA3, CA4*, CA5A,<br>CA6*, CA7, CA9*, CA12*, CA13, CA14*, CAMK2B*, CASP3*, CASP9*, CCL2*, CCR4*,<br>CDK1*, CSF2*, CSNK2A1*, CXCR1*, CYP1A1*, CYP1A2*, CYP1B1*, CYP2C8*,<br>CYP2C9*, CYP3A4*, CYP19A1*, DAPK1*, DRD4*, EGFR*, ELAVL1*, F2*, FLT3*,<br>GLO1*, GPR35, GSK3B*, GSTP1*, HCK*, HIBCH, HIF1A*, HSD17B2*, IGF1R*, IL6*,<br>JUN*, KDR*, MAOA*, MAPK8*, MCL1*, MET*, MMP2*, MMP3*, MMP9*, MMP13*,<br>MPO*, NEK2*, NEK6, NOX4, NUAK1, P4HB, PIK3CG*, PIK3R1*, PIM1*, PKN1*, |

|            |                       |                                                                                                                                                                                                                                                                         |
|------------|-----------------------|-------------------------------------------------------------------------------------------------------------------------------------------------------------------------------------------------------------------------------------------------------------------------|
|            |                       | PLA2G1B*, PLK1*, PON1*, PTGS2*, PTK2*, PTPRS*, PYGL*, SIRT1*, SLC2A2*, SRC*,<br>STK17B, TP53*, UGT1A1*, UGT1A3*, UGT1A7*, UGT3A1, VEGFA*, XDH*                                                                                                                          |
| LjT/AcT/Cm | $\beta$ -Sitosterol   | ACBD7, CYP17A1*, DHPS, DRAP1, GPBAR1*, LFT, MDM2*, MEX3D, MTOR*, NPC1L1,<br>NR1D2*, RAC1*, RANBP2*, RUVBL1*, TNNC1, USF1                                                                                                                                                |
| AcT        | 4'-Methylcapillarisin | CREB1*                                                                                                                                                                                                                                                                  |
| AcT        | Arcapillin            | CREB1*, CYP1B1*, PTPRS*                                                                                                                                                                                                                                                 |
| AcT        | Artepillin A          | CPSF4*, CYP2R1*, EME1*, FOLH1*, PTPRJ*, RNF31*                                                                                                                                                                                                                          |
| AcT        | Capillarisin          | CREB1*, CYP1B1*, PTPRS*                                                                                                                                                                                                                                                 |
| AcT        | Cirsimaritin          | ADORA1*, ADORA2A*, ADORA3, AKR1B1, CREB1*, CYP1B1*, PTPRS*                                                                                                                                                                                                              |
| AcT        | Eupalitin             | CREB1*, CYP1B1*                                                                                                                                                                                                                                                         |
| AcT        | Eupatolitin           | CREB1*, CYP1B1*                                                                                                                                                                                                                                                         |
| AcT        | Genkwanin             | ALDH2*, CREB1*, CYP1B1*, PTPRS*, XDH*                                                                                                                                                                                                                                   |
| AcT        | Isoarcapillin         | CREB1*, PTPRS*                                                                                                                                                                                                                                                          |
| AcT        | Isorhamnetin          | CA2*, CA4*, CA7, CA12*, CREB1*, CYP1A1*, CYP1B1*, ERN1*, P4HB, XDH*                                                                                                                                                                                                     |
| Cm         | Cordycepin            | ADCY5*, ADK, ADORA1*, ADORA2A*, ADORA2B*, ADORA3, AHCY, AHCYL1*,<br>AHCYL2, AMD1, CASP9*, DCK, DGUOK, DNMT3B*, DOT1L, DTYMK*, GAPDH*,<br>HSPA5, HSPA8*, IMPDH1*, KMT5C, MTAP, P2RX1, P2RY11, PRMT7, QARS1*, RARS,<br>RNASEL*, SETDB1*, SLC29A1*, SMS*, SRM, TARS1*, TK1 |

LjT, *Lonicera japonica* Thunberg; AcT, *Artemisia capillaris* Thunberg; Cm, *Cordyceps militaris*.

\*, Breast cancer-associated targets.
